# Supplementary material for: Distant Metastasis Risk Definition by Tumor Biomarkers Integrated Nomogram Approach for Locally Advanced Nasopharyngeal Carcinoma
Source: PubMed Central journal article supplement — Cancer Control. 2019 Oct 23;26(1):1073274819883895. doi: 10.1177/1073274819883895 (PMC6811765; doi:10.1177/1073274819883895), 2019-10-23
Supplement: Table_S.pdf [file Table_S.pdf]

**Table S1.** The tumor biomarkers immunohistochemical staining information.

| Pathological signaling | Tumor markers    | Antibody information   | Dilutions |
|------------------------|------------------|------------------------|-----------|
| Migration & Invasion   |                  |                        |           |
|                        | E-Cadherin       | Cell Signaling, # 4065 | 1:50      |
|                        | N-Cadherin       | Upstate, clone 13A9    | 1:200     |
|                        | $\beta$ -Catenin | Millipore, MAB2081     | 1:100     |
|                        | Snail            | Abcam, ab70983         | 1:50      |
|                        | Twist            | Santa Cruz, SC-102032  | 1:50      |
|                        | c-Met            | Santa Cruz, SC-161     | 1:200     |
|                        | nm23             | Santa Cruz, SC-56928   | 1:200     |
| Apoptosis & autophagy  |                  |                        |           |
|                        | Beclin 1         | Santa Cruz, SC-11427   | 1:200     |
|                        | AKT 1            | Cell Signaling, # 4685 | 1:100     |
|                        | Bax              | Santa Cruz, SC-7480    | 1:200     |
|                        | Survivin         | Santa Cruz, SC-47750   | 1:100     |
|                        | Bcl-2            | Santa Cruz, SC-7382    | 1:50      |
|                        | Pontin           | Cell Signaling, # 8959 | 1:100     |
| Cell cycle             |                  |                        |           |
|                        | 14-3-3 $\sigma$  | Santa Cruz, SC-100638  | 1:200     |
|                        | CENP-H           | Santa Cruz, SC-22792   | 1:200     |
|                        | Aurora-A         | Upstate, # 04-1037     | 1:200     |
|                        | Cyclin D1        | Cell Signaling, # 2978 | 1:200     |
|                        | CDC2             | Santa Cruz, SC-53      | 1:200     |
|                        | Ki-67            | Santa Cruz, SC-23900   | 1:50      |
|                        | ERK              | Santa Cruz, SC-94      | 1:200     |
|                        | P21              | Santa Cruz, SC-817     | 1:200     |
|                        | p-ERK            | Santa Cruz, SC-7383    | 1:100     |
|                        | P27              | Millipore, clone Y236  | 1:200     |
|                        | Stathmin         | Cell Signaling, # 3352 | 1:200     |
| Tumor microenvironment |                  |                        |           |
|                        | MMP-2            | Santa Cruz, SC-53630   | 1:200     |
|                        | MMP-9            | Santa Cruz, SC-6840    | 1:200     |
|                        | TIMP-2           | Santa Cruz, SC-21753   | 1:200     |
|                        | COX2             | Santa Cruz, SC-58344   | 1:200     |
|                        | HIF-1 $\alpha$   | Millipore, MAB5382     | 1:200     |
| Others                 |                  |                        |           |
|                        | EZH2             | Cell Signaling, # 4905 | 1:200     |
|                        | LMP 1            | Santa Cruz, SC-57721   | 1:200     |

**Table S2. Variables according to the univariate analysis.**

| Variables       | coef         | exp(coef)   | se(coef)    | z            | Pr(> z )    | AUC         | PH          |
|-----------------|--------------|-------------|-------------|--------------|-------------|-------------|-------------|
| Aurora-A        | 0.126952297  | 1.135362856 | 0.034739633 | 3.654393757  | 0.00025779  | 0.695999414 | 0.120069138 |
| Bcl-2           | 0.077710275  | 1.080809476 | 0.031517552 | 2.465619004  | 0.013677673 | 0.612798912 | 0.50623835  |
| Beclin 1        | 0.056136776  | 1.057742348 | 0.025556242 | 2.196597441  | 0.028049209 | 0.636282359 | 0.062936497 |
| 14-3-3 $\sigma$ | -0.08503123  | 0.9184836   | 0.039311422 | -2.163015895 | 0.030539957 | 0.613802692 | 0.989196149 |
| VCA-IgA         | 0.000797407  | 1.000797725 | 0.000369849 | 2.1560321    | 0.031081159 | 0.58473763  | 0.748765652 |
| P27             | 0.07253577   | 1.075231267 | 0.033884205 | 2.140695655  | 0.032298589 | 0.61159693  | 0.096584401 |
| MMP-2           | 0.058657164  | 1.060411632 | 0.033265451 | 1.763305866  | 0.077848916 | 0.606163109 | 0.848132344 |
| EA-IgA          | 0.003116134  | 1.003120994 | 0.001987462 | 1.567896015  | 0.116905402 | 0.540884174 | 0.633582755 |
| HIF-1 $\alpha$  | 0.041923286  | 1.042814477 | 0.027066378 | 1.548906379  | 0.121404227 | 0.524771482 | 0.300604781 |
| Cyclin D1       | 0.047566342  | 1.048715772 | 0.030825595 | 1.543079434  | 0.122811504 | 0.592943608 | 0.922351721 |
| CENP-H          | 0.058780189  | 1.060542097 | 0.040555166 | 1.449388466  | 0.147229128 | 0.581757404 | 0.50418346  |
| WHO             | -0.570517457 | 0.565232879 | 0.394528842 | -1.446072878 | 0.148156762 | 0.532576621 | 0.294009859 |
| Stathmin        | 0.044208125  | 1.045199864 | 0.030892589 | 1.43102684   | 0.152422523 | 0.586840557 | 0.336009655 |
| Ki-67           | 0.041035076  | 1.04188865  | 0.029594225 | 1.386590675  | 0.165566613 | 0.582160389 | 0.936445138 |
| MMP-9           | -0.125617139 | 0.881952447 | 0.096484678 | -1.301938731 | 0.192937331 | 0.577205436 | 0.969207908 |
| Bax             | 0.052018255  | 1.053394972 | 0.041431892 | 1.255512438  | 0.209292796 | 0.539884464 | 0.984617222 |
| Catenin         | 0.040191682  | 1.041010298 | 0.032968173 | 1.219105529  | 0.222804141 | 0.550701137 | 0.734862063 |
| Snail           | 0.044370837  | 1.045369945 | 0.038534637 | 1.151453334  | 0.249545783 | 0.549324688 | 0.079516506 |
| AER             | 0.749357182  | 2.115639609 | 0.650913724 | 1.151238873  | 0.249633977 | 0.608815493 | 0.803278031 |
| VCA             | 0.28357752   | 1.327871813 | 0.261758479 | 1.08335562   | 0.278650606 | 0.57767948  | 0.859340164 |
| c-Met           | 0.036634489  | 1.037313801 | 0.034201768 | 1.0711285    | 0.284111655 | 0.551064188 | 0.022733491 |
| CDC2            | 0.046845596  | 1.047960187 | 0.044149034 | 1.061078618  | 0.288654174 | 0.576760498 | 0.400081029 |
| T               | 0.20404802   | 1.226357041 | 0.219014489 | 0.931664481  | 0.351509948 | 0.565695116 | 0.0489483   |
| E-cad           | 0.029689608  | 1.030134739 | 0.032179469 | 0.922625796  | 0.356202248 | 0.539178243 | 0.3782955   |
| TIMP-2          | 0.034242389  | 1.034835409 | 0.040146954 | 0.852926213  | 0.393700224 | 0.566410604 | 0.183792262 |
| nm23            | -0.032785584 | 0.967746038 | 0.03998426  | -0.819962266 | 0.412237618 | 0.545506814 | 0.54108377  |
| COX2            | 0.025421656  | 1.025747542 | 0.035967986 | 0.706785653  | 0.479699692 | 0.555737658 | 0.90562872  |
| EZH2            | 0.018201344  | 1.018367998 | 0.026502147 | 0.686787516  | 0.492216638 | 0.560714195 | 0.624061954 |
| N               | 0.124201574  | 1.132244079 | 0.19082599  | 0.650862989  | 0.515134935 | 0.545974681 | 0.718619166 |
| Sex             | -0.22052534  | 0.802097313 | 0.351033259 | -0.628217794 | 0.529861275 | 0.504969045 | 0.148784741 |
| EA              | 0.13265644   | 1.141857634 | 0.218544439 | 0.606999841  | 0.543851018 | 0.543346754 | 0.883053055 |
| p-ERK           | -0.029786283 | 0.970652956 | 0.059617145 | -0.499626125 | 0.617338359 | 0.509284634 | 0.76151811  |
| N-Cad           | 0.017627393  | 1.017783673 | 0.038056113 | 0.463194792  | 0.643224749 | 0.54763044  | 0.712926442 |
| Pontin          | -0.023025211 | 0.977237847 | 0.057576589 | -0.399905778 | 0.689225916 | 0.514998601 | 0.641838141 |
| LMP 1           | 0.019041995  | 1.01922445  | 0.049949528 | 0.38122472   | 0.703036507 | 0.515161781 | 0.486878012 |
| P21             | 0.01572032   | 1.015844534 | 0.042411561 | 0.370661196  | 0.710889896 | 0.497173681 | 0.791886242 |
| Survivin        | 0.016101812  | 1.016232145 | 0.044898946 | 0.358623392  | 0.719876845 | 0.50183288  | 0.146531714 |
| Age             | 0.004538182  | 1.004548495 | 0.015801468 | 0.287200022  | 0.773959169 | 0.502040192 | 0.564525845 |
| Twist           | 0.01293119   | 1.01301516  | 0.046635178 | 0.277284034  | 0.781562018 | 0.523149952 | 0.266349058 |
| staging         | 0.081765965  | 1.085201804 | 0.309165534 | 0.264473091  | 0.791415397 | 0.532454237 | 0.741040722 |
| ERK             | 0.010706687  | 1.010764208 | 0.043764255 | 0.244644556  | 0.806731661 | 0.522089028 | 0.880874343 |
| AKT 1           | -0.009850149 | 0.990198205 | 0.044284307 | -0.222429784 | 0.823979328 | 0.553976197 | 0.950659901 |

**Abbreviation:** AUC, area under curve.
